# Supplementary material for: A flexible and lead-free BCZT thin film nanogenerator for biocompatible energy harvesting
Source: Royal Society of Chemistry journal article supplement (doi:10.1039/d1qm00145k), 2021-01-01
Supplement: d1qm00145k1.pdf [file d1qm00145k1.pdf]

## Supporting Information

### **Flexible and Lead-free BCZT Thin Film Nanogenerator for Biocompatible Energy Harvesting**

Shiyuan Liu,<sup>a</sup> Zhuomin Zhang,<sup>a</sup> Yao Shan,<sup>a</sup> Ying Hong,<sup>a</sup> Fatma Farooqui,<sup>a</sup> Fu Shing Lam,<sup>a</sup> Wei-Hsin Liao<sup>†b</sup>  
Zuankai Wang<sup>†a</sup> and Zhengbao Yang<sup>†a</sup>

<sup>a</sup> Department of Mechanical Engineering, City University of Hong Kong, Hong Kong, China

<sup>b</sup> Department of Mechanical and Automation Engineering, The Chinese University of Hong Kong, Shatin,  
NT, Hong Kong, China

<sup>†</sup>Correspondence to: W.L. (whliao@cuhk.edu.hk), Z.W. (zuanwang@cityu.edu.hk), Z.Y.  
(zb.yang@cityu.edu.hk).

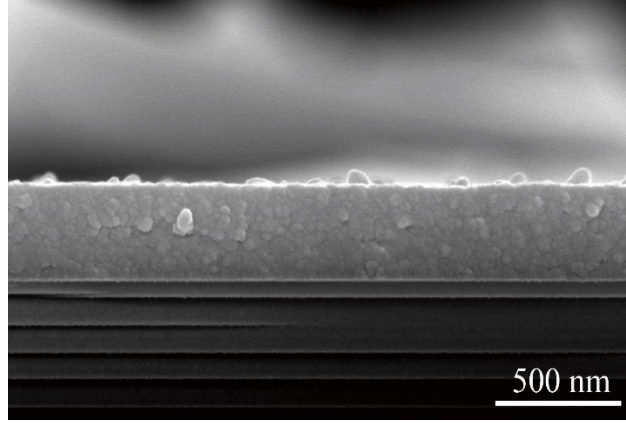

**Figure S1. SEM images of the cross-sectional view of the BCZT film and mica sheet.**

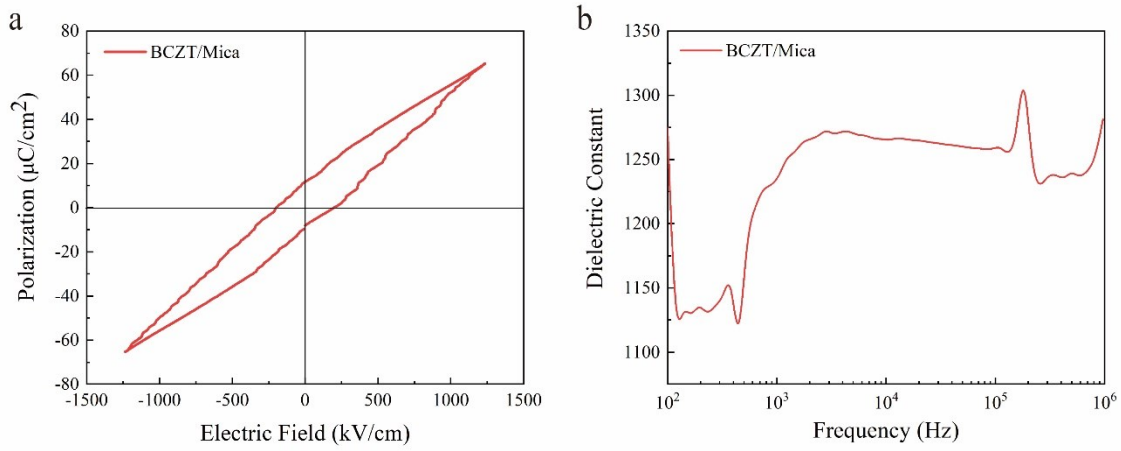

**Figure S2. Dielectric and ferroelectric properties of the BCZT thin film.** (a) The polarization-electric field hysteresis loop of the BCZT thin film. (b) The spectrum of the dielectric constant versus frequency.

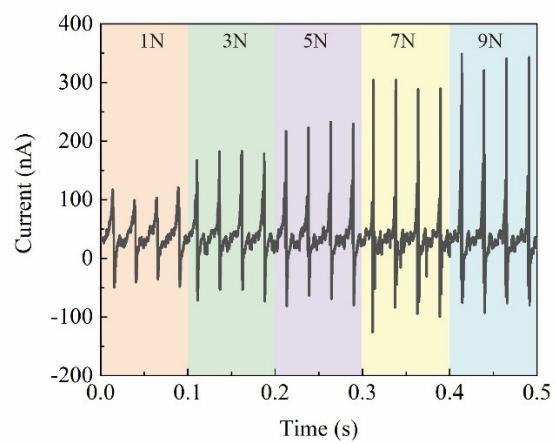

**Figure S3.** The short-circuit current of the PENG under the different magnitude of forces.
